# Supplementary material for: Genome Wide Analysis of Acute Myeloid Leukemia Reveal Leukemia Specific Methylome and Subtype Specific Hypomethylation of Repeats
Source: PLoS One. 2012 Mar 29;7(3):e33213. doi: 10.1371/journal.pone.0033213 (PMC3315563; doi:10.1371/journal.pone.0033213)
Supplement: Dataset S1 — Differentially methylated promoters. (XLS) [file pone.0033213.s029.xls]

## Sheet: AML Versus NBM
ID	AMD	P.Value	adj.P.Val			AMD= absolute methylation difference, Red= hypermethylated, Green= hypomethylated
KRTAP19-6	0.255186	0.000167146	0.129894
AZU1	0.257059	0.00900671	0.408031
SLC6A12	0.275487	0.000612881	0.202701
DPP6	0.456013	0.000732877	0.210943
NKX2-6	0.454523	0.00100687	0.225811
PRLHR	0.451819	8.05365e-05	0.112998
SPHKAP	0.449874	0.000277007	0.163985
GPR6	0.433401	3.91201e-05	0.0932183
ELAVL2	0.425419	3.30327e-06	0.0629702
DBX1	0.398184	0.000787517	0.210943
DBC1	0.379527	0.000796722	0.210943
NEF3	0.37269	0.000123317	0.126326
KCNA4	0.371181	0.00148693	0.257685
MTMR7	0.366848	5.04645e-05	0.0997415
CASP7	0.363382	0.00218215	0.293168
ESRRG	0.363283	0.00423115	0.345243
ZIC1	0.356284	0.00138698	0.251809
PCDH8	0.350796	0.0167231	0.470855
ADAMTS20	0.346907	0.00440657	0.348558
FERD3L	0.344713	0.00294585	0.309606
PCDHB1	0.343886	5.23221e-05	0.0997415
GRM7	0.342649	0.00285288	0.309002
DCC	0.341181	0.000920987	0.21946
TRPC6	0.340739	0.000139162	0.126326
PHYHIPL	0.339565	0.0120064	0.438309
GSH1	0.338963	0.000597883	0.202701
PABPC5	0.336232	0.000274402	0.163985
TBX20	0.332325	0.00686644	0.390103
CBLN4	0.332303	0.000819949	0.212407
TMEM204	0.329226	0.000177162	0.129894
UNC5D	0.326936	0.00158506	0.262748
ZNF454	0.326882	2.49491e-05	0.0932183
hsa-mir-124-2	0.324782	0.000609287	0.202701
TERT	0.322091	8.50538e-06	0.0810691
MYCL2	0.321827	0.000134912	0.126326
SYT10	0.320993	0.00876071	0.405953
ANKRD30B	0.318101	0.00111299	0.233153
REC8	0.317484	0.00132347	0.250446
MTNR1A	0.316907	8.89139e-05	0.112998
ADRA1A	0.316073	0.0074865	0.394807
TACR3	0.312853	0.000337221	0.16917
RAB36	0.31219	0.00183025	0.279121
FUT9	0.31206	0.00476765	0.349664
PCDHB6	0.309756	0.000720088	0.210943
FOXI2	0.308612	0.0156371	0.468105
PEG3	0.308492	0.000623214	0.202701
HS3ST2	0.304826	0.0193734	0.485941
RASGRF1	0.304295	0.0211774	0.496327
GRIK2	0.302057	0.000327935	0.16917
ABCC9	0.301678	0.00165762	0.26779
PCDHGC5	0.300367	0.0090386	0.408031
KCND2	0.299841	0.00642648	0.379292
KCNJ3	0.296821	0.00447908	0.349165
CARTPT	0.295937	0.000165368	0.129894
ZFHX4	0.295604	0.0057923	0.360219
CCBE1	0.294316	0.00224701	0.293168
HTR1A	0.293118	0.00140728	0.253084
TBX5	0.287381	0.00226284	0.293168
CDH8	0.287378	0.00349386	0.333017
HTRA4	0.287003	0.0089399	0.408031
UGT8	0.286589	0.0191335	0.483967
DOK6	0.285936	0.0144717	0.467664
PCDHGA6	0.28523	8.74318e-05	0.112998
CKMT2	0.284979	0.000629768	0.202701
ID4	0.284432	0.00262542	0.309002
SLITRK3	0.282835	0.0097397	0.41077
PDZRN3	0.281816	0.0106572	0.422269
OLIG3	0.281406	0.00281279	0.309002
KCNV1	0.280088	0.0133688	0.457852
PCDH17	0.279809	0.0188455	0.483967
CNTNAP5	0.279056	0.00554606	0.35732
DRD4	0.278899	0.00283627	0.309002
VAMP5	0.277952	0.0240674	0.504172
FAM84A	0.27703	0.00395014	0.341077
CDX4	0.277026	0.0106764	0.422269
SLC5A7	0.276325	8.03461e-05	0.112998
LTF	0.27525	0.00136853	0.251809
NOL4	0.272861	0.0278327	0.5089
RTDR1	0.272323	0.00526376	0.353637
ZNF154	0.271214	0.000999383	0.225811
ENTPD3	0.26843	0.000284724	0.163985
CDX1	0.2672	0.000129477	0.126326
GABRG2	0.266522	0.000137317	0.126326
RUSC1	0.266277	0.00178309	0.278888
PCDHA6	0.265503	0.000439839	0.199634
FEZF1	0.265342	0.009192	0.408031
SOX14	0.265331	0.0138965	0.462318
MTNR1B	0.262985	0.004758	0.349664
GHSR	0.261271	0.00390631	0.341077
LYPD1	0.260989	0.0235619	0.502416
SLC6A3	0.259082	0.0121353	0.438965
ZFP2	0.258747	0.026607	0.5089
WNT2	0.258632	0.0141716	0.466739
VSX1	0.258419	0.0116284	0.437225
IGHD3-22	0.257764	0.00118142	0.244798
ASXL3	0.255578	0.00241915	0.301414
SLIT2	0.254141	0.0156359	0.468105
HTR2C	0.254047	0.0190708	0.483967
TAC1	0.25387	0.0136893	0.462078
UGT3A1	0.253425	0.000330411	0.16917
KRT7	0.253372	0.000882069	0.216274
CADPS	0.252982	0.0214364	0.496327
MEI1	0.251873	0.00143053	0.254862
CPT1C	0.251215	0.0192016	0.48418
DSC3	0.250532	0.0145927	0.467867

## Sheet: t(8,21)
ID	AMD	P.Value	adj.P.Val			AMD= absolute methylation difference, Red= hypermethylated, Green= hypomethylated
LCN8	0.382191	0.000121411	0.0377226
PRLH	0.338088	9.39313e-05	0.0325566
ZAN	0.332746	0.00062802	0.0767432
C21orf124.	0.332707	5.58816e-05	0.0226653
C19orf21	0.311637	0.011354	0.351699
ZACN	0.310838	9.21441e-06	0.00960637
C20orf95	0.31032	0.00281763	0.179084
OR6J1.	0.307829	0.000777065	0.0861232
CYP4F22	0.304972	2.1561e-05	0.013952
ARC	0.294385	4.89436e-05	0.0212048
hsa-mir-1257	0.287176	2.68024e-06	0.00688431
CHRM1	0.281845	2.26886e-05	0.013952
GPR44	0.280478	0.000150296	0.0434106
CD34	0.278086	0.00326668	0.187562
CD7	0.27722	0.0311947	0.523546
VAMP5	0.273854	0.00373136	0.203813
HRC	0.273728	0.000583717	0.0756233
CLEC11A	0.273675	0.00749776	0.294701
PSCA	0.273547	0.000315901	0.0595159
ARL5C.	0.271947	0.0202174	0.4311
PCDH24	0.270341	0.000366193	0.0642633
ISG20	0.267864	0.000245004	0.0513242
HR	0.267136	3.91338e-05	0.0203211
TNNI3	0.266882	0.0031381	0.185095
KIAA0284.	0.26502	0.000100138	0.0334899
SLC22A18	0.259933	0.00122041	0.112609
TAS2R3	0.256885	0.000372411	0.0642633
hsa-mir-1-1	0.256395	0.00292897	0.181905
PTGIR	0.255583	0.000624377	0.0767432
LAT	0.254672	0.000720058	0.0826895
PRR9	0.249595	4.62412e-05	0.020988
PNOC	0.248548	1.28896e-05	0.0106029
CBLN4	0.234352	0.00314249	0.185095
FOXB2	0.242676	0.0112786	0.351699
CTNND2	0.243177	8.94198e-05	0.0315668
ZFHX4	0.244002	0.00226867	0.156474
PTPRZ1	0.244281	0.00293878	0.181905
TBX5	0.244826	0.00475487	0.231821
WBSCR17	0.245486	0.0494393	0.603288
HTR1A	0.245738	0.00117277	0.109864
C20orf100	0.246236	0.00643464	0.274206
DPP10	0.246525	0.00268087	0.174421
PCDHB5	0.246566	0.00448904	0.224208
SOX17	0.248498	0.00110806	0.107457
TACR3	0.248973	0.000187312	0.0469832
C1QL2	0.249025	0.000596852	0.0756233
ABCC9	0.249789	0.0107682	0.344419
ID4	0.250083	0.00690092	0.282734
VGLL2	0.25058	0.00811317	0.299797
TMEM46	0.252376	0.00114059	0.108715
SLIT3	0.252553	0.00264688	0.173393
TMEM16E	0.252887	0.00420597	0.219153
DBX2	0.253342	0.000727212	0.0830111
NR2E1	0.255165	0.0201184	0.430553
ENPP5	0.255362	0.00229231	0.156796
MSC	0.255724	0.00207336	0.147479
OSMR	0.25576	0.00136788	0.117658
C10orf53	0.256033	0.00697083	0.282734
PLOD2	0.256198	0.001323	0.11569
RIC3	0.25686	0.000112581	0.0363751
AIM2	0.257463	0.000923687	0.0962199
C10orf67	0.257598	0.00462409	0.227775
C3orf32	0.258633	0.00141806	0.118186
PPAPR5	0.258835	0.0139843	0.380831
PCDH17	0.259602	0.0335253	0.537505
TRPC4	0.261411	0.000377271	0.0642633
SIX6	0.262215	0.00166256	0.127282
IGHVIII-16-1	0.262259	0.00253551	0.169001
KCNIP4	0.262306	0.00198952	0.144206
ASXL3	0.263094	0.000493796	0.0724343
PLG	0.263385	0.0165578	0.402728
GPR26	0.263609	1.00785e-05	0.00960637
MAL2	0.263912	0.0104533	0.340428
GDA	0.263999	0.000380097	0.0642633
HPSE2	0.264188	0.00583142	0.257432
ERC2	0.264293	0.00129779	0.115471
MTNR1A	0.265008	0.000392456	0.0643963
PTF1A	0.265787	0.00780024	0.298803
EFEMP1	0.265911	0.0107291	0.3443
NKX2-8	0.266085	0.000217418	0.0494383
C11orf70	0.267234	0.00163701	0.127282
C8orf70	0.267384	0.00342693	0.191576
KCNB1	0.267743	0.0112278	0.351699
LYPD1	0.268071	0.0129522	0.36531
NEF3	0.268795	0.00178402	0.133367
FZD10	0.270621	7.77283e-06	0.00960637
UNC5C	0.271083	0.0216363	0.443974
GALR1	0.271275	0.00803224	0.299645
CBLN2	0.271533	0.0017214	0.129703
CLEC14A	0.272858	0.000288869	0.0556233
hsa-mir-124-2	0.272977	0.00350046	0.194546
OTOP1	0.273045	0.000758542	0.0854806
MTNR1B	0.273121	0.00438672	0.222277
GFRA1	0.273875	0.00185268	0.136362
PDPN	0.274539	0.000889253	0.0931419
PRLHR	0.274882	0.00189724	0.139104
CACNB2	0.274904	0.000412785	0.0655743
GSH1	0.275087	0.0044205	0.222343
PENK	0.275352	0.00539989	0.248643
ZNF560	0.277001	0.000177544	0.0469832
MSX2	0.277051	0.000691584	0.0803882
CCDC60	0.277897	1.33489e-05	0.0106029
GRIA4	0.279243	0.00106702	0.104849
DKK1	0.280146	0.00182258	0.13519
MYOD1	0.281899	0.00101323	0.101659
ADAMTS9	0.282667	0.000240962	0.0511459
SUCLG2	0.284366	0.000185503	0.0469832
KIF6	0.284672	1.70947e-05	0.012412
PAK7	0.285318	0.0007149	0.0825948
FAT	0.286545	0.000493965	0.0724343
ZNF214	0.286557	0.00471013	0.230482
CA10	0.286761	0.00262365	0.172464
FAM110C	0.286962	0.00168584	0.128548
SLC25A21	0.28716	0.000849143	0.0914532
HOXB4	0.287407	0.000258413	0.0529691
RND3	0.288835	0.00124307	0.112841
TRHDE	0.288896	0.00647546	0.274206
HOXC13	0.289642	1.33449e-05	0.0106029
SOX9	0.290074	0.0129814	0.36531
PROX1	0.291321	0.00320549	0.1862
NLRP14	0.291831	0.00538453	0.248643
FGF12	0.293186	0.00208732	0.14792
PCDH10	0.293464	0.00569996	0.256166
NELL2	0.293479	0.000191817	0.0471596
LHFPL3	0.293625	0.00396669	0.210047
EPHA10	0.2958	0.00012619	0.0377226
NPY1R	0.2969	0.000474112	0.0711654
GHR	0.297815	0.000263502	0.0534376
C8orf34	0.298925	4.48209e-05	0.0208395
RYR2	0.299543	0.000138644	0.040661
FAM74A1.	0.300336	0.000832653	0.0901868
ELAVL2	0.301885	4.76744e-05	0.0211353
VWC2	0.302257	0.00237556	0.16077
PLD5	0.30237	0.00396137	0.210047
PAX9	0.304499	0.0179732	0.415284
LMX1A	0.306377	1.8231e-05	0.012412
HOOK1	0.307859	0.000210721	0.0494383
EVX2	0.308489	0.006908	0.282734
AASS	0.308571	8.10314e-05	0.0291453
DCC	0.309972	0.00126578	0.114281
FAM5B	0.311337	0.000241469	0.0511459
IGSF9B	0.31162	0.00017563	0.0469832
SYT9	0.312424	3.45962e-05	0.0193973
DRD5P2.	0.312994	0.046501	0.590572
CHL1	0.314325	0.000217847	0.0494383
SLC5A8	0.315734	9.2082e-06	0.00960637
PAX7	0.316582	0.0033356	0.188126
UCHL1	0.317319	2.49286e-05	0.0148504
HIST3H2A	0.318512	0.000657673	0.0784337
CDH8	0.31946	0.00016647	0.0469171
NPY5R	0.319922	2.4049e-06	0.00688431
NOL4	0.320373	0.00116746	0.109864
GULP1	0.321577	0.00321354	0.1862
SORCS3	0.321654	0.00306628	0.184784
CHAT	0.321802	0.000114572	0.0364013
UNC5D	0.321885	0.000663454	0.0785554
MAMDC1	0.322529	0.00293904	0.181905
CNTNAP5	0.323268	0.00123351	0.112828
SNAP25	0.323291	0.000515968	0.0728736
SOX1	0.324627	7.0102e-06	0.00960637
ZIC1	0.325671	0.00184869	0.136362
GRIN3A	0.326295	7.72814e-05	0.0288866
GABRA4	0.327004	0.000420725	0.06574
FEZF1	0.32729	0.000513459	0.0728736
ADCYAP1	0.328987	0.00461431	0.227775
C14orf39	0.329172	3.69215e-05	0.0201096
SLC6A3	0.32936	0.00107994	0.105574
GRP	0.329563	0.00162828	0.127282
CCBE1	0.329972	0.000270401	0.0540535
FERD3L	0.332072	0.00491918	0.237576
SOX14	0.336869	0.000233978	0.0511459
FAM84A	0.337441	0.000276365	0.0540535
WNT2	0.342023	0.00141975	0.118186
ZNF215	0.343845	0.000186786	0.0469832
HIST3H2BB	0.344026	0.00093521	0.0968908
TAC1	0.350323	7.99805e-05	0.0291453
SPHKAP	0.353073	0.000420582	0.06574
KCNA4	0.353734	0.0011736	0.109864
PAX3	0.355197	4.09399e-05	0.0203211
LRAT	0.356142	5.12293e-05	0.0217019
FUT9	0.357984	0.000558651	0.0745987
KCND2	0.358354	0.000543439	0.0741917
SLC6A15	0.359233	0.000214762	0.0494383
NETO1	0.359345	2.57326e-06	0.00688431
RASEF	0.360082	0.000192963	0.0471596
PPAPR3	0.360715	0.00425645	0.219153
ZNF804B	0.36103	0.000568053	0.0746813
SLITRK3	0.36391	0.000555059	0.0745987
FEZF2	0.36437	0.000658312	0.0784337
DBC1	0.365624	0.000167359	0.0469171
FOXQ1	0.371975	2.14486e-06	0.00688431
DCHS2	0.37623	0.000111034	0.0363751
CPT1C	0.378946	9.57056e-05	0.0325792
THRB	0.385052	2.23687e-05	0.013952
SYT10	0.386219	0.000762299	0.0854806
DPP6	0.386947	4.21127e-05	0.0203211
KCNN2	0.387123	0.000588552	0.0756233
HS3ST2	0.387378	0.000350547	0.0631067
NEFL	0.396729	0.000174154	0.0469832
ADAMTS5	0.397947	0.000348099	0.0631067
DSC3	0.398008	7.56903e-06	0.00960637
UGT8	0.399933	0.000775733	0.0861232
NKX2-6	0.400053	0.00328744	0.187562
EGLN3	0.400211	1.81659e-05	0.012412
SLC18A3	0.402027	7.50649e-05	0.0286192
GPC6	0.403083	0.000301871	0.0575456
SFRP1	0.405356	1.15843e-05	0.0105158
PHYHIPL	0.411502	0.000618408	0.0766399
RASGRF1	0.41312	0.000957693	0.0981532
ADAMTS20	0.419809	0.000174709	0.0469832
ST6GAL2	0.421172	1.45469e-05	0.0110923
EYA4	0.421388	2.00422e-06	0.00688431
ADRA1A	0.426928	4.21559e-05	0.0203211
TBX20	0.436761	7.13988e-05	0.027777
RAX	0.438241	6.22223e-05	0.0247113
FOXI2	0.446465	0.000247811	0.0513481
DBX1	0.452398	5.65911e-06	0.00960637
KCNV1	0.456184	7.93475e-06	0.00960637
GPR158	0.459469	4.64028e-06	0.00960637
PCDH8	0.461619	0.000237004	0.0511459
NGF	0.468004	2.54311e-06	0.00688431
CCDC140	0.480026	1.1817e-06	0.00688431
MAGI2	0.50213	9.57744e-06	0.00960637

## Sheet: t(15,17) 
ID	AMD	P.Value	adj.P.Val			AMD= absolute methylation difference, Red= hypermethylated, Green= hypomethylated
BCL9	0.273883	0.00551532	0.680552
KRT80	0.272841	0.0010763	0.586216
hsa-mir-140	0.26707	3.64055e-06	0.0384712
hsa-let-7a-3	0.265111	0.000676696	0.502574
PTPRZ1	0.241599	0.00318633	0.680488
HTR2C	0.244591	0.0193073	0.868589
PDZRN3	0.246669	0.0115447	0.791514
RTKN	0.248635	0.00582787	0.683051
RHOD	0.253962	0.000668277	0.502574
HIST1H3G	0.256644	6.88334e-05	0.170945
HS3ST2	0.258653	0.0080936	0.71762
MMP7	0.260567	0.00192868	0.656543
PTPN6	0.2621	9.39264e-05	0.198947
HLA-K	0.262733	0.0153142	0.836438
SPHKAP	0.26311	0.00446383	0.680488
HCG4P6	0.274514	0.0123242	0.791907
FAM124B	0.275044	0.000480524	0.465281
ZFHX4	0.277333	0.000803599	0.502574
IGHD6-25	0.277641	0.000581551	0.502574
IGHD6-19	0.284398	0.00214098	0.670011
CHAD	0.29596	0.0274986	0.934413
RSHL1	0.309685	0.00836066	0.723207
NOL4	0.312535	0.00142899	0.6491
PGAM2	0.31708	2.94021e-05	0.140123
KHDRBS2	0.319008	4.03622e-06	0.0384712
CD34	0.322419	0.0010285	0.576658
GRM7	0.33491	0.000624045	0.502574
DPP6	0.338319	0.000168073	0.266998
TNNI3	0.34427	0.000383649	0.430206
WBSCR17	0.345873	0.00861805	0.73521
CADPS	0.346491	0.00227634	0.670011
VAMP5	0.350633	0.000510748	0.465281
DOK6	0.370902	0.000477732	0.465281

## Sheet: NK
ID	AMD	P.Value	adj.P.Val			AMD= absolute methylation difference, Red= hypermethylated, Green= hypomethylated
HOXB3	0.374995	2.91648e-05	0.211482
GTSF1	0.330991	6.26926e-05	0.211482
RNASE1	0.328872	0.000200052	0.281773
TMSL3	0.313682	0.00706645	0.479387
ZNF407	0.30431	0.000406523	0.28472
ZNF684	0.29709	0.000336355	0.281773
MYF6	0.292403	0.000433136	0.28472
AOC3	0.28622	2.81321e-05	0.211482
C8orf34	0.275294	0.00010595	0.224414
TRAJ47	0.268163	0.000239585	0.281773
ADRA1D	0.260152	0.000554696	0.300521
RBM35B	0.238406	0.0143787	0.551647
CASP7	0.23985	0.0449825	0.649099
VAMP5	0.247647	0.00736266	0.482608
TREX2	0.251507	0.00774648	0.482608
IKBKG	0.25304	0.0128688	0.54306
SLC16A2	0.256307	0.00835678	0.482776
HDX	0.257997	0.0370315	0.63365
BGN	0.259155	0.0105354	0.524621
WDR40B	0.260566	0.000299714	0.281773
TBC1D25	0.260691	0.0191702	0.5866
UCHL5IP	0.261227	0.00318467	0.405969
CSAG4.	0.261301	0.0145017	0.55289
MAGEA12	0.261301	0.0145017	0.55289
ATG4A	0.263949	0.0173942	0.575018
hsa-mir-888	0.26485	0.000878983	0.310908
ACTA1	0.265259	0.000421418	0.28472
CXorf34	0.266059	0.0132205	0.54306
IDH3G	0.266578	0.0195421	0.5866
PSMD10	0.26738	0.0212957	0.5866
KIAA1166	0.26832	0.0222695	0.5866
PPP1R3F	0.270306	0.0121297	0.538645
C1orf145	0.270541	0.00161944	0.381129
hsa-mir-890	0.273548	0.000600081	0.300521
CEBPE	0.278649	0.00262143	0.405969
TFE3	0.280553	0.00619165	0.470245
TAZ	0.282666	0.00824743	0.482776
OPHN1	0.283952	0.0239038	0.597026
CDX4	0.284525	0.00661898	0.471004
ARMCX5	0.285204	0.0380918	0.636627
FAM25B.	0.285706	0.0037238	0.407205
SPNS3	0.290598	0.000318194	0.281773
C21orf77.	0.295584	0.00312905	0.405969
PRLHR	0.297119	0.00101106	0.323657
TRIM46	0.298178	0.00204612	0.391269
DNASE1L1	0.309239	0.003551	0.407205
CA5B	0.31068	0.00332993	0.405969
FAM123B	0.310762	0.00205706	0.391269
CETN2	0.310826	0.0274117	0.612602
SPIN3	0.312632	0.00629905	0.471004
GALM	0.31285	0.0013004	0.354136
RAB33A	0.313154	0.0371352	0.63365
CXorf40A	0.313599	0.0120717	0.537672
KIAA2022	0.316838	0.00323648	0.405969
OTUD5	0.316993	0.00340507	0.407205
CSTF2	0.320383	0.0210276	0.5866
KLHL34	0.321396	0.0098268	0.517656
NSDHL	0.331755	0.0197507	0.5866
GPRASP1	0.33755	0.000348903	0.281773
MAOA	0.338047	0.00544812	0.454877
KCNE1L	0.351481	0.000536086	0.300521
LAS1L	0.360536	0.0109802	0.52624
ELK1	0.363068	0.00662167	0.471004
VMO1	0.365722	5.19338e-05	0.211482
GPR101	0.403778	0.00568748	0.459849

## Sheet: trisomy 8
ID	AMD	P.Value	adj.P.Val			AMD= absolute methylation difference, Red= hypermethylated, Green= hypomethylated
DSCR8	0.401313	0.008661	0.299911
PGAM2	0.391775	2.51196e-06	0.0239427
KLHL34	0.384096	0.00297506	0.258844
PTPN22	0.35871	0.000394575	0.163517
FCGR1B	0.339632	0.000265145	0.157819
CTGLF10P	0.326518	0.00492792	0.266177
SPANXN5	0.322708	1.72716e-06	0.0239427
DSCR4	0.317811	0.021141	0.365851
hsa-mir-890	0.316739	0.000151765	0.157819
RNASE7	0.310066	0.000653334	0.187773
CD5L	0.308561	2.06916e-05	0.098611
PCDH8	0.307674	0.00626935	0.27829
ESX1	0.303165	0.0294268	0.405027
OR4M2	0.301057	0.000960564	0.216203
POU3F4	0.297775	0.00868335	0.299911
NLGN3	0.296553	0.000687053	0.187773
GPR171	0.294396	0.00595041	0.273563
TCEAL7	0.293606	0.00408621	0.265631
OR5H14	0.291793	0.000264619	0.157819
TRPM8	0.291344	0.000502947	0.17096
TRAV8-4	0.290564	0.00119468	0.231967
IFITM3	0.290127	0.000232784	0.157819
WFDC5	0.289345	0.000643337	0.187773
USP26	0.288992	0.00348766	0.26288
NRK	0.287536	0.0209026	0.364896
HEPH	0.285242	0.00188025	0.247798
hsa-mir-361	0.283429	0.000905784	0.214039
MAGEC2	0.281243	0.000360278	0.163517
PROL1	0.277339	0.00304156	0.258844
OR4N2	0.27381	0.00200515	0.252735
BCHE	0.27254	0.00402228	0.265631
C21orf94	0.27116	0.00307087	0.258844
IGKV1-27	0.270267	0.00018391	0.157819
MRPS16P	0.268857	0.00140998	0.239268
AQP10	0.268564	0.0109258	0.319595
hsa-mir-1283-2	0.268378	0.00992523	0.30765
ODZ1	0.26532	0.00507653	0.266177
KRTAP3-3	0.263997	0.00271359	0.252735
C21orf99.	0.262855	0.0082135	0.299911
CXorf59	0.262622	0.00296799	0.258844
OR4K12P	0.262217	0.00857968	0.299911
OR51A4	0.261789	0.007123	0.287523
CYP4A11	0.26119	0.00263111	0.252735
FAAH2	0.260084	0.0159603	0.34
IPO5	0.259917	0.000647926	0.187773
FAM40A	0.259199	0.00220785	0.252735
IGKV3-11	0.2588	0.00110082	0.231967
CXCR3	0.258336	0.0114692	0.321998
OR1D4	0.2577	0.00892773	0.299911
WDR21B	0.257004	0.0321818	0.414641
OR5H15	0.256617	0.00641183	0.281633
LCE2C	0.256291	0.000703745	0.187773
CEACAMP6	0.255608	0.0482198	0.46425
DEFA3	0.255534	0.000511184	0.17096
DEFB114	0.254717	0.012535	0.328563
ACSM2	0.254662	0.00172187	0.247798
F8	0.252426	0.000270474	0.157819
IGKV1-16	0.250371	0.000322874	0.157819
C11orf82	0.248414	0.0150875	0.335034
KRTAP19P3	0.247787	0.00135148	0.239268
IGLV7-35	0.244694	0.0149321	0.334026
HIST1H2BB	0.263905	0.0270982	0.395538
FBXO16	0.270601	0.000307649	0.157819
RPS4Y1	0.277793	0.0129011	0.329437
CHI3L1	0.279285	0.00160192	0.244607
RTP1	0.281527	0.00082022	0.203063
DDX3Y	0.281984	0.040326	0.441548
CLDN15	0.293627	0.0186696	0.353766
TMSB4Y	0.294874	0.0114599	0.321998
LAMB2	0.309993	3.7442e-05	0.120423
CDC27	0.346408	0.00127837	0.236598
SNX16	0.407621	0.000744411	0.194393
RPS4Y2	0.410411	0.0239147	0.380222
